# Supplementary material
Source: Springer Nature journal article supplement (https://www.springermedizin.de/resource/supplementary/12943_2013_1167_MOESM4_ESM.pdf/9552644)

IST 2012 dataset

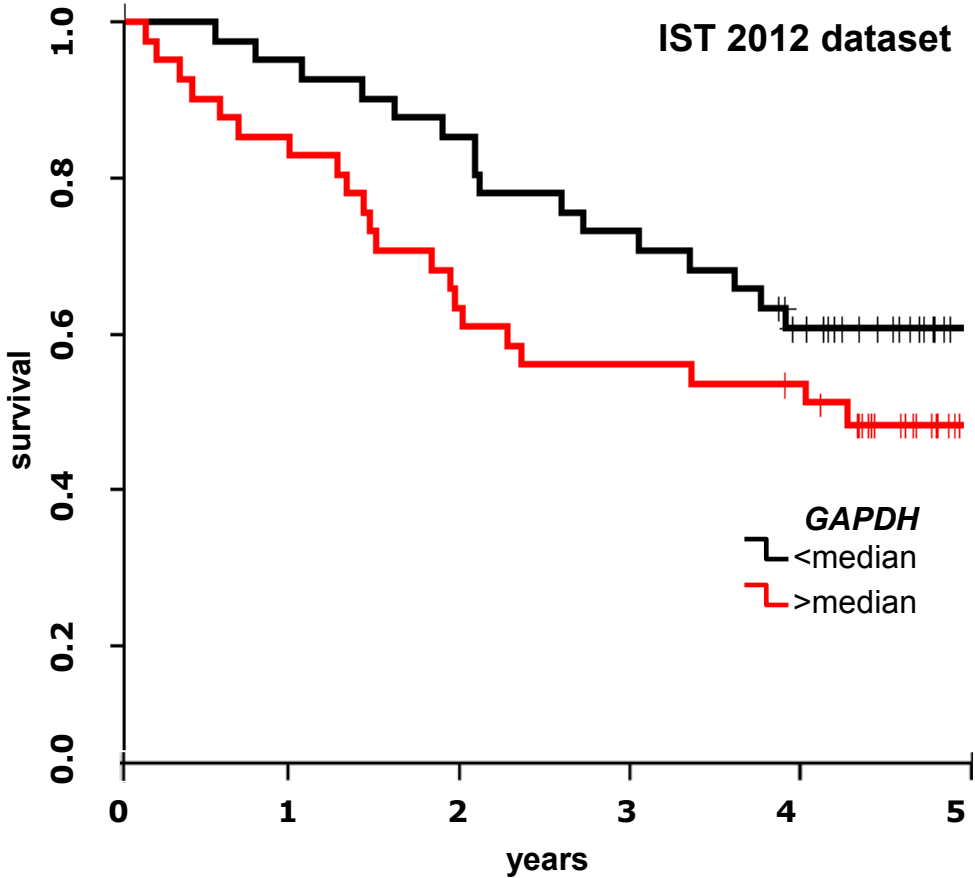

IST 2012 dataset



Supplement: MOESM4 [file 9552644]
